# Supplementary material for: Epidemiology of multiple sclerosis and vitamin D levels in Lanzarote, Canary Islands, Spain
Source: PeerJ. 2019 Dec 18;7:e8235. doi: 10.7717/peerj.8235 (PMC6966995; doi:10.7717/peerj.8235)
Supplement: Data S1 [file peerj-07-8235-s001.xlsx]

## Sheet: Fig 3
PATIENT	IN/OUT	MS/HD	MS	POPULATION	VITD SUPPLEMENTS	GENDER	AGE (STUDY ONSET)	AGE OF DISEASE ONSET (YEARS OLD)	DISEASE DURATION (MONTHS, STUDY ONSET)	TREATMENT	TREATMENT DURATION (MONTHS, STUDY ONSET)	EDSS	25(OH)D - OCTOBER (ng/ml)	25(OH)D - NOVEMBER (ng/ml)	25(OH)D - DECEMBER (ng/ml)	25(OH)D - JANUARY (ng/ml)	25(OH)D - FEBRUARY (ng/ml)	25(OH)D - MARCH (ng/ml)	25(OH)D - APRIL (ng/ml)	25(OH)D - MAY (ng/ml)	25(OH)D - JUNE (ng/ml)	25(OH)D - JULY (ng/ml)	25(OH)D - AUGUST (ng/ml)	25(OH)D - SEPTEMBER (ng/ml)
1	IN	MS	RR	IBERIAN PENINSULA	NO	M	25	20	61	IMMUNOSUPPRESSANT	11	4	30.5	26.8	23.4	23	24	23.4	27.8	24.9	31.1	43.4	33.6	46.9
2	IN	MS	RR	IBERIAN PENINSULA	NO	F	51	28	276	WITHOUT TREATMENT	-	4	22.8	24	21.4	18.7	-	16.3	-	18.3	19.6	22.9	21.1	21.9
3	IN	MS	RR	IBERIAN PENINSULA	NO	M	49	26	273	WITHOUT TREATMENT	-	3.5	19.1	20	14.1	13.8	15.7	15.6	21.6	22.1	21.1	-	26.6	27.3
4	IN	MS	RR	CANARY ISLANDS (NOT LANZAROTE)	NO	F	25	22	38	WITHOUT TREATMENT	-	1	13.2	19.7	12.7	9.6	10.4	10.7	18.9	17.9	20.8	24.9	21.9	16.9
5	IN	MS	RR	LANZAROTE	NO	F	52	51	12	IMMUNOMODULATOR	1	0	24.2	26.4	22.6	23.6	24.7	19.6	25.6	22.6	22	23.9	24.2	26.3
6	OUT	MS	PP	IBERIAN PENINSULA	YES	F	61	47	166	WITHOUT TREATMENT	-	6	33.2	31.1	28.5	26.4	29.1	25.1	33.1	81	64	62.4	44.1	48
7	IN	MS	RR	SOUTH AMERICA	NO	F	41	32	113	WITHOUT TREATMENT	-	1	36.5	36	34.2	33.2	35.9	33.4	37.4	38.5	36.4	42.8	41	42.6
8	IN	MS	RR	LANZAROTE	NO	F	45	33	138	IMMUNOSUPPRESSANT	7	2	30	29.8	28.8	22.2	25.3	20.5	27	24.8	25	31	29.6	33.5
9	IN	MS	RR	CANARY ISLANDS (NOT LANZAROTE)	NO	F	38	28	122	IMMUNOMODULATOR	116	1.5	21.9	24.8	20.8	18.7	22.4	18.2	21.9	18.9	20	22.6	22.4	21.9
10	IN	MS	RR	IBERIAN PENINSULA	NO	M	37	16	250	IMMUNOMODULATOR	130	1.5	33.9	33.1	30.5	31.6	38	36.5	45	39.8	46.3	54.2	53.3	63.4
11	IN	MS	RR	LANZAROTE	NO	M	53	41	139	IMMUNOSUPPRESSANT	22	4	37.4	37	35.4	32.6	32.1	20.7	29.3	26	33	34.1	31.3	35.4
12	IN	MS	RR	CANARY ISLANDS (NOT LANZAROTE)	NO	M	43	19	284	IMMUNOMODULATOR	224	1.5	39.5	34.1	33.1	31.4	35.2	31.8	46.4	45.1	52.3	55.7	50.9	49.9
13	IN	MS	RR	CANARY ISLANDS (NOT LANZAROTE)	NO	F	35	20	172	WITHOUT TREATMENT	-	0	23.5	24.4	24.4	24.2	28.3	21.3	24.4	19.7	26.5	30.8	28.4	32.5
14	IN	MS	SP	LANZAROTE	NO	F	61	48	157	IMMUNOSUPPRESSANT	54	5	19.4	19.1	18.2	17	17.9	12.3	15	9.8	12.2	16.9	-	-
15	OUT	MS	RR	EUROPE	YES	F	63	50	156	IMMUNOMODULATOR	71	2.5	30.9	32.9	28.4	23.1	30.5	26.6	32.7	32.2	33.9	34.1	41.1	-
16	IN	MS	RR	LANZAROTE	NO	M	29	13	188	IMMUNOMODULATOR	130	1.5	28.6	27.4	27.5	22.8	26.2	21.5	28.4	21.6	30.4	35.6	33	34
17	IN	MS	RR	IBERIAN PENINSULA	NO	M	43	33	118	WITHOUT TREATMENT	-	-	30.2	28.9	28	20.4	28.7	20.9	30.3	-	-	-	40.1	43.7
18	IN	MS	RR	LANZAROTE	NO	M	39	25	170	IMMUNOSUPPRESSANT	62	2.5	21.4	17	19.9	20.3	22	15.3	-	20	24.6	35.8	40.6	36.1
19	IN	MS	RR	EUROPE	NO	F	47	25	262	IMMUNOSUPPRESSANT	64	4	39.5	36.5	32.9	26.9	29.4	27.9	38	39.8	43.2	41.3	48.1	45.3
20	IN	MS	RR	IBERIAN PENINSULA	NO	F	54	36	219	IMMUNOSUPPRESSANT	9	5	34.6	30	31.2	26.3	27.1	21.1	33.6	33.2	41.2	36.6	39.7	40.8
21	IN	MS	RR	IBERIAN PENINSULA	NO	M	31	27	46	IMMUNOMODULATOR	33	0	-	63	48.6	42.8	49.7	35.9	61.2	51.1	70.6	87.2	90.7	88.4
22	IN	MS	RR	LANZAROTE	NO	F	47	26	244	IMMUNOMODULATOR	137	1.5	27.1	22.9	22.6	19.8	26.5	19.5	23.9	19.9	22.1	27.3	24.2	24.8
23	IN	MS	RR	LANZAROTE	NO	M	35	24	128	IMMUNOSUPPRESSANT	9	1.5	42.2	39.8	36.6	31.2	34.1	28.7	36.5	35.1	38.7	-	39.3	47.6
24	IN	MS	RR	IBERIAN PENINSULA	NO	F	46	34	136	IMMUNOMODULATOR	73	1	31.6	28.9	24.9	21.1	25.4	21.9	27	25.9	27.1	29.8	28.5	30.8
25	IN	MS	RR	LANZAROTE	NO	M	42	35	83	IMMUNOSUPPRESSANT	63	1	24.4	23.5	22	18.9	24.2	19.8	27	21.7	24.8	27.7	26.4	24.4
26	IN	MS	RR	LANZAROTE	NO	F	39	21	216	WITHOUT TREATMENT	-	1	16.9	15.9	17	13.5	15.8	10	17.3	13.1	14.9	20.8	18.8	15.5
27	IN	MS	RR	LANZAROTE	NO	F	35	19	188	IMMUNOMODULATOR	69	1	51.3	44.6	48.8	40.6	40.1	43.1	-	46.1	54.2	52.5	51.4	54.5
28	IN	MS	RR	LANZAROTE	NO	M	42	30	135	IMMUNOSUPPRESSANT	40	2.5	34.3	30.8	33.7	27.9	28.8	25.3	32.9	27.9	33.7	30.7	37.3	35.5
29	IN	MS	PP	LANZAROTE	NO	F	47	32	189	WITHOUT TREATMENT	-	6	23.2	27.5	28.6	24.4	25.4	19.8	24.2	18.4	23.1	22.7	23.2	21.2
30	IN	MS	RR	LANZAROTE	NO	M	49	34	177	WITHOUT TREATMENT	-	1	48.3	37.9	36.7	29.3	31.7	27.7	34.8	30.9	33.6	41.7	46.5	50.1
31	OUT	MS	RR	EUROPE	YES	F	60	19	490	WITHOUT TREATMENT	-	2	38.2	38.6	36.3	37.9	40.8	37.8	42.8	45.7	40	41	41.1	46.2
32	IN	MS	RR	LANZAROTE	NO	F	45	38	77	IMMUNOSUPPRESSANT	15	2	21.8	24.1	22.5	21.6	20.6	22.3	23.8	24.5	26.2	27.6	28	26.1
33	IN	MS	RR	LANZAROTE	NO	F	37	31	73	IMMUNOMODULATOR	34	1	79.2	69.8	58.7	53.9	42.9	46.1	55.2	51.8	54	63.7	59.8	61.1
34	IN	MS	RR	LANZAROTE	NO	F	66	56	118	IMMUNOMODULATOR	61	3	38.4	38.1	36	33	33.8	33.6	40.7	38.1	37.7	41.4	40.5	41.2
35	IN	MS	RR	EUROPE	NO	F	34	27	74	WITHOUT TREATMENT	-	1.5	45.3	43.8	35.6	35.2	34.8	39.1	48	42	53.7	63.3	59.4	58.7
36	IN	MS	RR	LANZAROTE	NO	F	38	33	64	WITHOUT TREATMENT	-	1.5	33.7	29.2	24.4	19.8	17.3	-	24.5	22.9	27.6	32.3	31.1	30.5
37	OUT	MS	CIS	AFRICA	NO	F	24	19	62	WITHOUT TREATMENT	-	-	15.9	14.7	12.9	12.9	10.4	21.8	26.4	-	17.3	-	21	18
38	IN	MS	SP	EUROPE	NO	M	66	46	238	IMMUNOMODULATOR	93	6	25.7	22.7	19.8	17.6	22.2	22.6	24.9	24.1	22.2	27.5	23.5	23.8
39	IN	MS	RR	LANZAROTE	NO	M	34	25	107	IMMUNOMODULATOR	56	1.5	34.5	33.4	32.9	28.2	21.1	22.3	36.3	27.4	38.7	43.5	42.8	48.8
40	IN	MS	RR	EUROPE	NO	F	48	38	121	WITHOUT TREATMENT	-	1.5	45	42.7	41.2	31.5	28.8	34.5	49.2	35	48.8	58.8	55.4	55.8
41	IN	MS	RR	LANZAROTE	NO	F	51	26	303	WITHOUT TREATMENT	-	1	32.3	27.9	21.8	18.1	15.2	15.5	23.7	25.1	29.1	36.8	39.9	45.9
42	IN	MS	PP	LANZAROTE	NO	F	58	25	394	WITHOUT TREATMENT	-	6.5	26.6	27	23.3	21	19.2	19.6	24.7	23.3	25.2	29.9	27.3	28.7
43	IN	MS	RR	IBERIAN PENINSULA	NO	F	35	28	84	IMMUNOSUPPRESSANT	8	1	33.7	31.8	25.8	25.1	24.1	24	34.6	35.2	36.3	41.1	41.9	42.7
44	IN	MS	RR	IBERIAN PENINSULA	NO	F	40	28	142	WITHOUT TREATMENT	-	1.5	26.4	21	16.3	14.6	13.6	13.2	16.3	32.1	33.6	36	33	41
45	IN	MS	RR	LANZAROTE	NO	F	48	38	116	WITHOUT TREATMENT	-	1	23.9	20.2	19.2	18.3	16.4	18.6	17.6	20.2	23.3	27.2	25.1	24.8
46	IN	MS	RR	LANZAROTE	NO	F	43	38	53	WITHOUT TREATMENT	-	1	34.9	32.3	30.1	24.9	21.4	24.3	25.1	27.7	28.9	32.4	28.7	30.3
47	IN	MS	RR	LANZAROTE	NO	F	28	22	69	WITHOUT TREATMENT	-	0	50.7	37.7	28.3	22.6	21.7	30.6	31.3	40.5	45.4	59.2	56.4	59.4
48	OUT	MS	CIS	LANZAROTE	NO	F	33	30	34	IMMUNOMODULATOR	27	0	39.4	35.7	37.7	32.4	31.1	34	38.6	43.2	40.7	46.1	49.2	52
49	IN	MS	RR	LANZAROTE	NO	M	51	42	108	WITHOUT TREATMENT	-	1.5	33.7	32.6	26.6	24.8	25	-	31.9	31	29.6	-	30.4	-
50	IN	MS	RR	LANZAROTE	NO	M	51	34	200	IMMUNOMODULATOR	22	5.5	28.3	30.4	30.4	23.7	21.7	24.4	24.2	26.6	30	28.9	31.8	25.5
51	IN	MS	RR	LANZAROTE	NO	F	54	50	49	WITHOUT TREATMENT	-	1.5	36.7	37.5	32.3	28.9	17.1	17.4	21.6	17	25.1	-	40	34.7
52	OUT	MS	CIS	LANZAROTE	NO	F	38	37	22	WITHOUT TREATMENT	-	1	19.2	19.3	20.9	18.8	13.9	15.4	16.1	19.6	19.7	22.4	22.2	23.5
53	IN	MS	RR	LANZAROTE	NO	F	26	23	28	IMMUNOMODULATOR	16	0	26.3	26.4	32.8	21.2	16.8	25.6	27.2	27.9	28.9	29.5	26.9	32.1
54	IN	MS	RR	SOUTH AMERICA	NO	F	14	11	35	IMMUNOMODULATOR	11	0	25.5	24.1	20.9	17.9	21.2	18.5	21.9	23.3	26	25.3	27.1	28
55	OUT	MS	CIS	LANZAROTE	NO	F	31	30	18	WITHOUT TREATMENT	-	2	26.9	31.8	34.8	24.7	28.3	35.9	33.3	36.8	40.5	46.3	44.2	52.9
56	IN	MS	RR	LANZAROTE	NO	F	47	43	46	WITHOUT TREATMENT	-	0	27.2	20.6	19.8	15.4	12.1	16	14.4	18.1	18.4	26.1	27.6	30.5
57	IN	MS	RR	EUROPE	NO	M	64	38	310	WITHOUT TREATMENT	-	3.5	66.5	53.3	49.8	49.5	47.1	53.3	57.9	62.2	80.2	91.9	69.9	86.8
58	IN	MS	RR	EUROPE	NO	F	52	30	262	WITHOUT TREATMENT	-	3	65.2	61.2	59.2	50.5	52	56.8	55.9	58.2	59.2	74.8	72.4	78.7
59	IN	MS	RR	CANARY ISLANDS (NOT LANZAROTE)	NO	M	38	31	93	WITHOUT TREATMENT	-	0	33.8	29.1	28.1	24.2	23.2	24.6	25.7	25.4	-	-	34.5	37.8
60	IN	MS	RR	EUROPE	NO	F	49	34	173	IMMUNOMODULATOR	45	1	36.2	36.9	36.5	31	29.4	29.5	32.8	35	-	42.7	-	40.9
101	IN	HD	-	LANZAROTE	NO	M	26	-	-	-	-	-	44.1	39.1	34.8	34	34.9	36.6	42.9	39.2	42.5	51.1	53.4	47.2
102	IN	HD	-	CANARY ISLANDS (NOT LANZAROTE)	NO	F	51	-	-	-	-	-	33.7	25.6	27.9	25.9	32.7	29.2	35.3	31.4	37	43	38.7	37.5
103	IN	HD	-	IBERIAN PENINSULA	NO	M	49	-	-	-	-	-	22	18.1	18.9	11.4	15.6	13.9	19	20.9	24.5	-	25.6	22.3
104	IN	HD	-	CANARY ISLANDS (NOT LANZAROTE)	NO	F	26	-	-	-	-	-	38	28.8	34.9	28.7	30.6	28	36.3	32.9	48.5	50.8	46.1	46.6
105	IN	HD	-	CANARY ISLANDS (NOT LANZAROTE)	NO	F	52	-	-	-	-	-	21.7	20.3	21.5	14.7	20.8	16	20.6	18.4	20.6	21.2	20.7	19
106	IN	HD	-	LANZAROTE	NO	M	60	-	-	-	-	-	32.4	29.3	26.6	19.4	26.4	21.3	30.7	23.6	32.6	32.3	27.1	26.3
107	IN	HD	-	LANZAROTE	NO	F	41	-	-	-	-	-	36.6	33.3	30.7	27.6	30.5	27.4	27	27.2	33.6	38.9	32.7	35.1
108	IN	HD	-	LANZAROTE	NO	F	45	-	-	-	-	-	30.1	25.8	28.3	23.2	28.9	23.1	24.3	20.5	26.3	26.6	25.8	25.8
109	IN	HD	-	CANARY ISLANDS (NOT LANZAROTE)	NO	F	37	-	-	-	-	-	45.2	43.4	43.6	38.6	38.4	36.8	39.3	36.3	48.5	49.7	44.2	46.7
110	IN	HD	-	IBERIAN PENINSULA	NO	M	37	-	-	-	-	-	43.4	35.4	33.3	24.8	36	33.2	46.3	44.8	64.3	58.1	56.4	51
111	IN	HD	-	LANZAROTE	NO	M	53	-	-	-	-	-	19.4	13.8	18.4	12.6	17.6	11.7	18.8	13.4	20.5	20.6	20.4	18.5
112	IN	HD	-	CANARY ISLANDS (NOT LANZAROTE)	NO	M	43	-	-	-	-	-	30.2	26.6	24.9	17.1	25.5	27.8	31.2	27.8	36.9	-	36	36.6
113	IN	HD	-	CANARY ISLANDS (NOT LANZAROTE)	NO	F	35	-	-	-	-	-	37	35.1	37	28.3	30.8	24.1	31.5	28.7	44.1	42.1	37.1	39.8
114	IN	HD	-	LANZAROTE	NO	F	61	-	-	-	-	-	24.4	17.2	20.1	13.4	14.4	13.9	15	15.8	18.7	24	28.3	28.4
115	IN	HD	-	IBERIAN PENINSULA	NO	F	62	-	-	-	-	-	23.3	20.1	20.1	14.9	17.8	15.8	19.6	17.2	21.9	19.6	20.6	22.1
116	IN	HD	-	IBERIAN PENINSULA	NO	M	29	-	-	-	-	-	40.9	34	30.8	24.9	28.3	26.5	34.3	31.1	40	45.7	37.5	40.8
117	IN	HD	-	IBERIAN PENINSULA	NO	M	43	-	-	-	-	-	33.1	27.7	26.4	19.3	25.1	20.4	32.9	28.9	42.9	48.4	42.6	41.4
118	IN	HD	-	LANZAROTE	NO	M	39	-	-	-	-	-	27.4	21.2	22.7	16	20.2	19.6	22.8	22.1	25.7	26.8	26.2	26.4
119	IN	HD	-	LANZAROTE	NO	F	47	-	-	-	-	-	25.5	22.8	25.8	18.4	24.5	24.3	26.9	24.9	32.2	34.8	35.2	35.3
120	IN	HD	-	IBERIAN PENINSULA	NO	F	54	-	-	-	-	-	31.7	30.4	31.4	21.8	27.9	28.1	28	33.3	35.1	38.2	35	-
121	IN	HD	-	IBERIAN PENINSULA	NO	M	31	-	-	-	-	-	31.6	26.8	27.8	23.5	29.6	25.4	29.9	31	42.5	43.4	31.9	31.3
122	IN	HD	-	LANZAROTE	NO	F	47	-	-	-	-	-	34.9	26	22.6	21.9	24.3	18.5	25.1	21.4	27.9	32.7	31.9	26.1
123	IN	HD	-	LANZAROTE	NO	M	35	-	-	-	-	-	29.7	26.1	28.1	21.2	28.4	22.4	23.5	23.7	-	-	42.5	35.2
124	IN	HD	-	IBERIAN PENINSULA	NO	F	46	-	-	-	-	-	37.4	40	42.7	33.5	37.8	29.5	34.6	33	42.5	46.6	46.8	47.2
125	IN	HD	-	IBERIAN PENINSULA	NO	M	42	-	-	-	-	-	57.6	50.5	46.8	40	46.9	40.6	51.1	49.5	60.5	60.1	75.6	91.3
126	IN	HD	-	LANZAROTE	NO	F	39	-	-	-	-	-	19.5	15.9	13.5	9.6	14.3	10	13.7	13.1	17.9	19.4	21.8	21
127	IN	HD	-	IBERIAN PENINSULA	NO	F	35	-	-	-	-	-	26.9	24.4	25.7	21.7	26.7	20.8	21.8	22.1	28	29.6	30.2	27.6
128	IN	HD	-	IBERIAN PENINSULA	NO	M	42	-	-	-	-	-	23.7	16.5	15.9	10.6	16.9	13.6	17.5	14.5	27.9	28.7	23.6	17
129	IN	HD	-	LANZAROTE	NO	F	46	-	-	-	-	-	21.3	20.4	19	31.7	57.1	30.2	20.4	17.2	20	24.5	20	20.3
130	IN	HD	-	IBERIAN PENINSULA	NO	M	49	-	-	-	-	-	44.4	40.3	38.3	30.9	35.6	35	33.2	34.5	41.9	40.4	45.8	52.2
131	IN	HD	-	LANZAROTE	NO	F	59	-	-	-	-	-	14.7	10.9	11	12.7	11.3	13.2	-	9.7	16.3	16.1	15	14.6
132	IN	HD	-	LANZAROTE	NO	F	45	-	-	-	-	-	37.5	35.5	34.6	31.2	27.8	28.6	34.3	28.9	31.8	43.1	49.1	43
133	IN	HD	-	LANZAROTE	NO	F	37	-	-	-	-	-	28.3	25	23.5	21.5	22	22.8	25.6	-	25.9	30.1	33.4	27.8
134	IN	HD	-	IBERIAN PENINSULA	NO	F	66	-	-	-	-	-	27.3	25.2	25.5	21.7	21.7	22	22.9	25.9	22.9	27.2	26.8	24.2
135	IN	HD	-	LANZAROTE	NO	F	34	-	-	-	-	-	31.6	29.4	27.1	26.6	25.9	28.3	29.2	30.4	27.8	32.1	34.5	36.1
136	IN	HD	-	LANZAROTE	NO	F	37	-	-	-	-	-	27.3	25.2	25.4	22.8	24.3	24.6	23.9	26	26.7	37.3	31.9	27.4
137	IN	HD	-	LANZAROTE	NO	F	24	-	-	-	-	-	30.1	34.1	33	28.8	21.2	28.1	36.1	38.2	53	50.5	-	-
138	IN	HD	-	CANARY ISLANDS (NOT LANZAROTE)	NO	M	66	-	-	-	-	-	27.5	24	24	19.7	18.2	20.3	26.9	23.6	26.6	-	32.7	30.2
139	IN	HD	-	LANZAROTE	NO	M	34	-	-	-	-	-	47.9	35.4	27.2	21.6	19.1	19.8	27.5	37.1	43.8	58.1	57.5	51
140	IN	HD	-	LANZAROTE	NO	F	49	-	-	-	-	-	23.6	24.9	22.7	21.5	21.6	23.1	22.2	21.2	24.9	-	27	24.4
141	IN	HD	-	LANZAROTE	NO	F	51	-	-	-	-	-	24.1	22.7	22	21.5	15.8	17.7	21.3	19	24.1	28.2	26.8	26.6
142	IN	HD	-	LANZAROTE	NO	F	58	-	-	-	-	-	34.2	32	33.1	30.9	19.3	20	-	21.4	28.8	34.2	33.4	30.6
143	IN	HD	-	IBERIAN PENINSULA	NO	F	35	-	-	-	-	-	48.9	42.9	41.8	39.2	30.1	33.4	42	33	43.1	52.1	53.1	43.5
144	IN	HD	-	LANZAROTE	NO	F	40	-	-	-	-	-	21.5	19.8	17.1	14.4	12.3	13.7	14.9	16.8	16.7	20.4	23.2	19.9
145	IN	HD	-	LANZAROTE	NO	F	47	-	-	-	-	-	29.1	23.5	19.8	19.3	16.6	16.3	21.1	21.7	23.7	32.5	33.6	28.6
146	IN	HD	-	LANZAROTE	NO	F	42	-	-	-	-	-	27	27.5	25.5	23.1	17.8	19.8	25.6	21.8	26.6	30.6	34.9	32.2
147	IN	HD	-	LANZAROTE	NO	F	28	-	-	-	-	-	39.6	32.7	29	27.4	22.5	43	47.3	27	35	43.2	39.7	39
148	IN	HD	-	LANZAROTE	NO	F	32	-	-	-	-	-	40.4	33.8	31.9	27.6	21.7	22.7	28.4	24.4	36	40.7	40	39.5
149	IN	HD	-	LANZAROTE	NO	M	51	-	-	-	-	-	35.7	33.7	34.5	25.8	27	30.1	28.1	29.5	31.3	37.4	44	38.9
150	IN	HD	-	LANZAROTE	NO	M	50	-	-	-	-	-	38.9	35.6	35.2	31	27.8	30.4	32.1	30.3	41.1	41	42.9	41.7
151	IN	HD	-	LANZAROTE	NO	F	54	-	-	-	-	-	28.2	23.9	27.9	23.5	19.8	20.9	21.7	19.7	22.3	25.8	29.7	28
152	IN	HD	-	LANZAROTE	NO	F	38	-	-	-	-	-	28.2	29.8	30.6	26.6	24.9	24.6	25.2	22.9	25.4	29.5	31.9	30.6
153	IN	HD	-	LANZAROTE	NO	F	26	-	-	-	-	-	31.5	34.3	33.9	31.5	22.8	25.4	32.8	26.4	32.5	37	38.8	35
154	OUT	HD	-	-	-	-	-	-	-	-	-	-	-	-	-	-	-	-	-	-	-	-	-	-
155	IN	HD	-	LANZAROTE	NO	F	31	-	-	-	-	-	28.9	26.4	28.9	22.6	18.1	20.1	20.9	20.3	20.7	27.7	38.5	30.5
156	IN	HD	-	LANZAROTE	NO	F	47	-	-	-	-	-	32.6	35.1	33.8	30.2	25.5	33.7	32.4	29.3	33.6	36.2	40	37.3
157	OUT	HD	-	LANZAROTE	NO	M	64	-	-	-	-	-	25.9	21.6	21.7	17	-	-	-	-	-	-	-	-
158	IN	HD	-	LANZAROTE	NO	F	52	-	-	-	-	-	27.7	26.6	27.6	22.5	18.6	19.8	22.3	25.2	27.6	35.2	36.1	35
159	IN	HD	-	IBERIAN PENINSULA	NO	M	39	-	-	-	-	-	28.2	24	26.5	23.4	16.8	18.6	23.7	17.7	24.6	34.4	31.7	25.5
160	IN	HD	-	LANZAROTE	NO	F	49	-	-	-	-	-	16.5	12	10.2	9.8	6.2	6	10.1	7.6	9.3	13.9	13.2	11.3

## Sheet: Results Section
MONTH	MEDIAN 25(OH)D - MS+HD (ng/ml)	MEDIAN 25(OH)D - MS (ng/ml)	MEDIAN 25(OH)D - HD (ng/ml)	MEDIAN UVB RADIATION - SAME MONTH (Wh/m2)	MEDIAN UVB RADIATION - 1 MONTH BEFORE (Wh/m2)	MEDIAN UVB RADIATION - 2 MONTHS BEFORE (Wh/m2)	MEDIAN UVB RADIATION - 3 MONTHS BEFORE (Wh/m2)	MEDIAN UVB RADIATION - 4 MONTHS BEFORE (Wh/m2)	MEDIAN UVB RADIATION - 5 MONTHS BEFORE (Wh/m2)	MEDIAN UVB RADIATION - 6 MONTHS BEFORE (Wh/m2)	MEDIAN UVB RADIATION - 7 MONTHS BEFORE (Wh/m2)	MEDIAN UVB RADIATION - 8 MONTHS BEFORE (Wh/m2)	MEDIAN UVB RADIATION - 9 MONTHS BEFORE (Wh/m2)	MEDIAN UVB RADIATION - 10 MONTHS BEFORE (Wh/m2)	MEDIAN UVB RADIATION - 11 MONTHS BEFORE (Wh/m2)
NOVEMBER '14	30.4	31.6	30.1	5	6.3	7.6	8.9	9	9.4	9	9.1	7.4	6	4.8	4.4
DECEMBER '14	28.8	29.9	26.6	4	5	6.3	7.6	8.9	9	9.4	9	9.1	7.4	6	4.8
JANUARY '15	27.9	28.4	27.2	5	4	5	6.3	7.6	8.9	9	9.4	9	9.1	7.4	6
FEBRUARY '15	23.2	24	22.8	5.5	5	4	5	6.3	7.6	8.9	9	9.4	9	9.1	7.4
MARCH '15	24.7	25.3	24.3	7	5.5	5	4	5	6.3	7.6	8.9	9	9.4	9	9.1
APRIL '15	22.8	22.5	23	9	7	5.5	5	4	5	6.3	7.6	8.9	9	9.4	9
MAY '15	27	27.8	26.9	9	9	7	5.5	5	4	5	6.3	7.6	8.9	9	9.4
JUNE '15	25.9	27	24.9	9	9	9	7	5.5	5	4	5	6.3	7.6	8.9	9
JULY '15	29.4	30	28	10	9	9	9	7	5.5	5	4	5	6.3	7.6	8.9
AUGUST '15	35	35.6	34.8	9	10	9	9	9	7	5.5	5	4	5	6.3	7.6
SEPTEMBER '15	33.6	34.1	33.6	8	9	10	9	9	9	7	5.5	5	4	5	6.3
OCTOBER '15	35	36.1	31	6	8	9	10	9	9	9	7	5.5	5	4	5
